# Supplementary material for: Antiprotozoal Compounds from Urolepis hecatantha (Asteraceae)
Source: Hindawi journal article supplement (doi:10.1155/2021/6622894), 2021-02-11
Supplement: f1 [file 6622894.f1.pdf]

## Supplementary Materials

### Antiprotozoal compounds from *Urolepis hecatantha* (Asteraceae)

Orlando G. Elso<sup>a,b</sup>, Maria Clavin<sup>a,b</sup>, Natalia Hernandez<sup>a</sup>, Tomás Sgarlata<sup>a</sup>, Hernán

Bach<sup>c,d</sup>, César A. N. Catalan<sup>e</sup>, Elena Aguilera<sup>f</sup>, Guzman Alvarez<sup>g,†</sup>, Valeria P.

Sülsen<sup>a,b,\*,†</sup>

<sup>a</sup> Universidad de Buenos Aires, Facultad de Farmacia y Bioquímica, Cátedra de Farmacognosia, Junín 956 2° floor (1113). Buenos Aires, Argentina.

<sup>b</sup> CONICET – Universidad de Buenos Aires. Instituto de Química y Metabolismo del Fármaco (IQUIMEFA), Junín 956 2° floor (1113). Buenos Aires, Argentina.

<sup>c</sup> Universidad de Buenos Aires, Facultad de Farmacia y Bioquímica, Museo de Farmacobotánica, Junín 956 1° floor (1113). Buenos Aires, Argentina.

<sup>d</sup> Instituto de Recursos Biológicos INTA-Hurlingham, De los Reseros y N. Repetto (1686), Hurlingham, Buenos Aires, Argentina

<sup>e</sup> Universidad Nacional de Tucumán. Facultad de Bioquímica Química y Farmacia. Instituto de Química Orgánica. Ayacucho 471 (T4000INI). San Miguel de Tucumán, Argentina.

<sup>f</sup> Grupo de Química Medicinal-Laboratorio de Química Orgánica, Facultad de Ciencias, Universidad de la República, Montevideo, C.P. 11400, Uruguay.

<sup>g</sup> Laboratorio de Moléculas Bioactivas, Universidad de la República, CENUR Litoral Norte, C.P. 60000, Paysandú, Uruguay.

\* Corresponding author:

Tel: +54-11-5287-4286; Fax: 54-11-4508-3642

E-mail: [vsulsen@ffyb.uba.ar](mailto:vsulsen@ffyb.uba.ar); E-mail: [guzmanalvarezlqo@gmail.com](mailto:guzmanalvarezlqo@gmail.com)

† The work was co-directed by both authors.

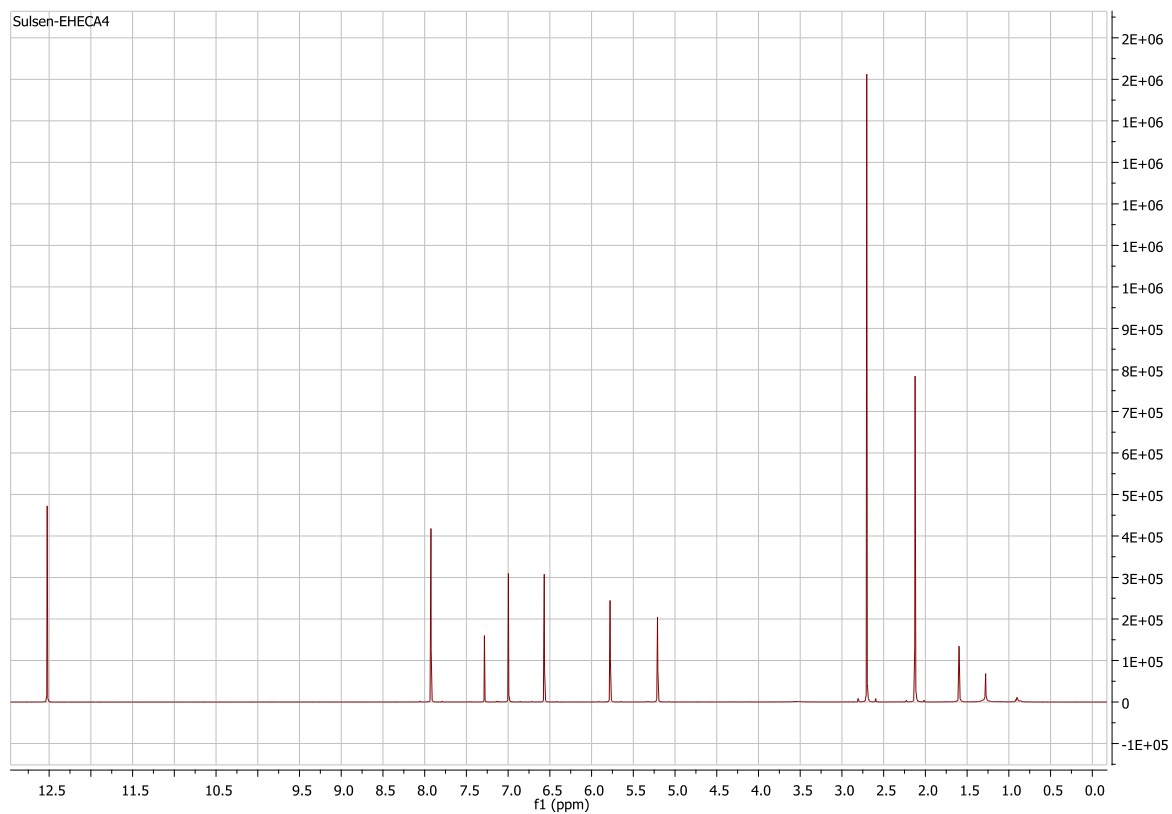

**Figure S1.** <sup>1</sup>H-NMR spectrum of euparin in CDCl<sub>3</sub>.

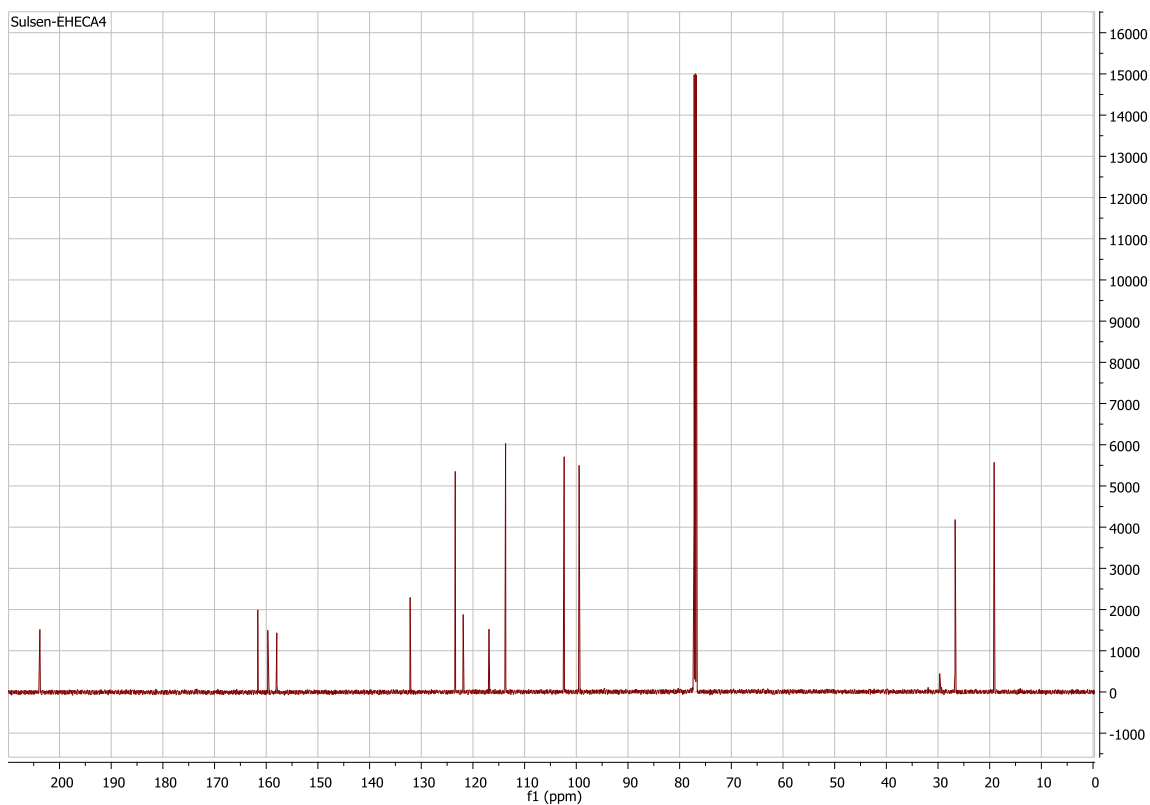

Figure S2.  $^{13}\text{C}$ -NMR spectrum of euparin in  $\text{CDCl}_3$ .

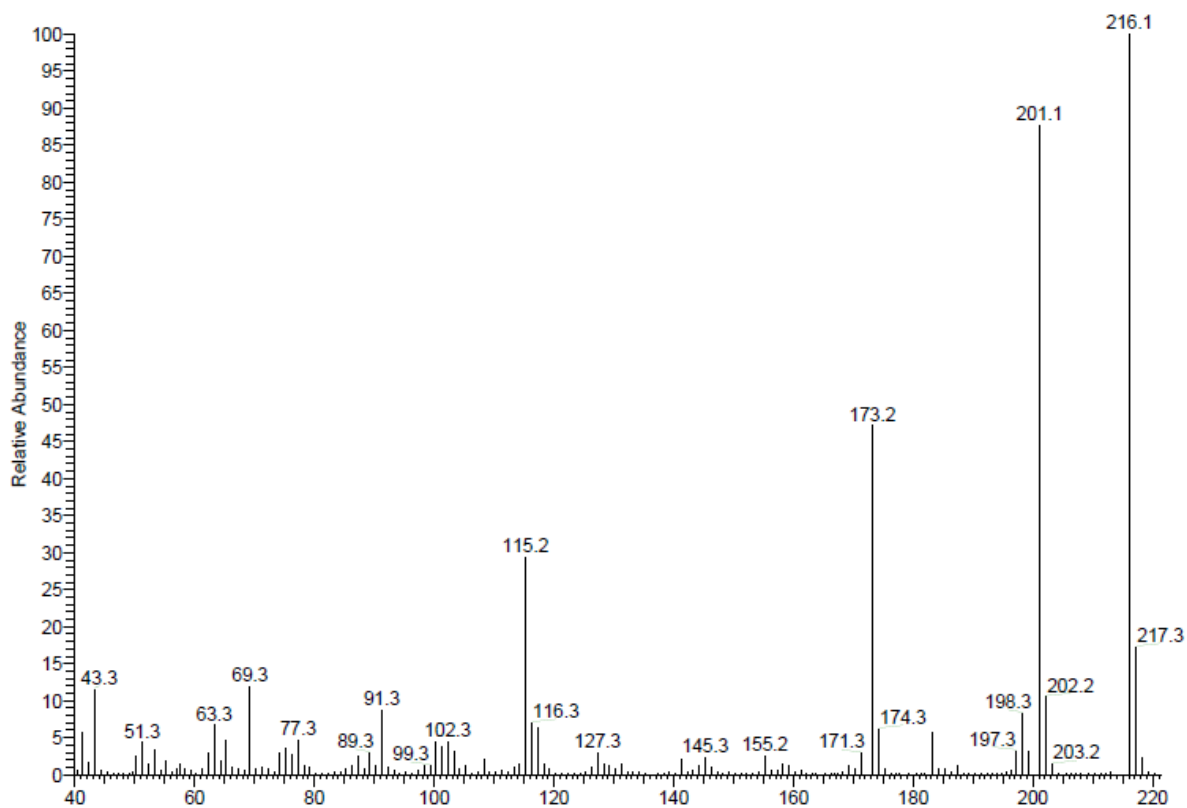

Figure S3. EI-MS spectrum of euparin (70 eV).

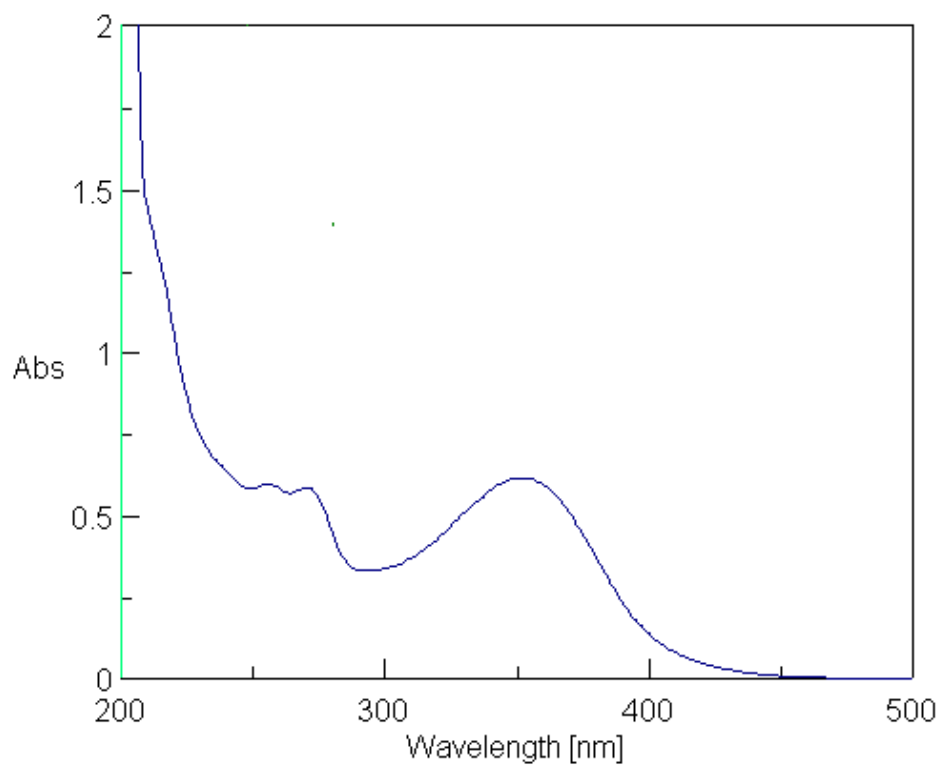

**Figure S4. UV spectrum of jaceidin in MeOH.**

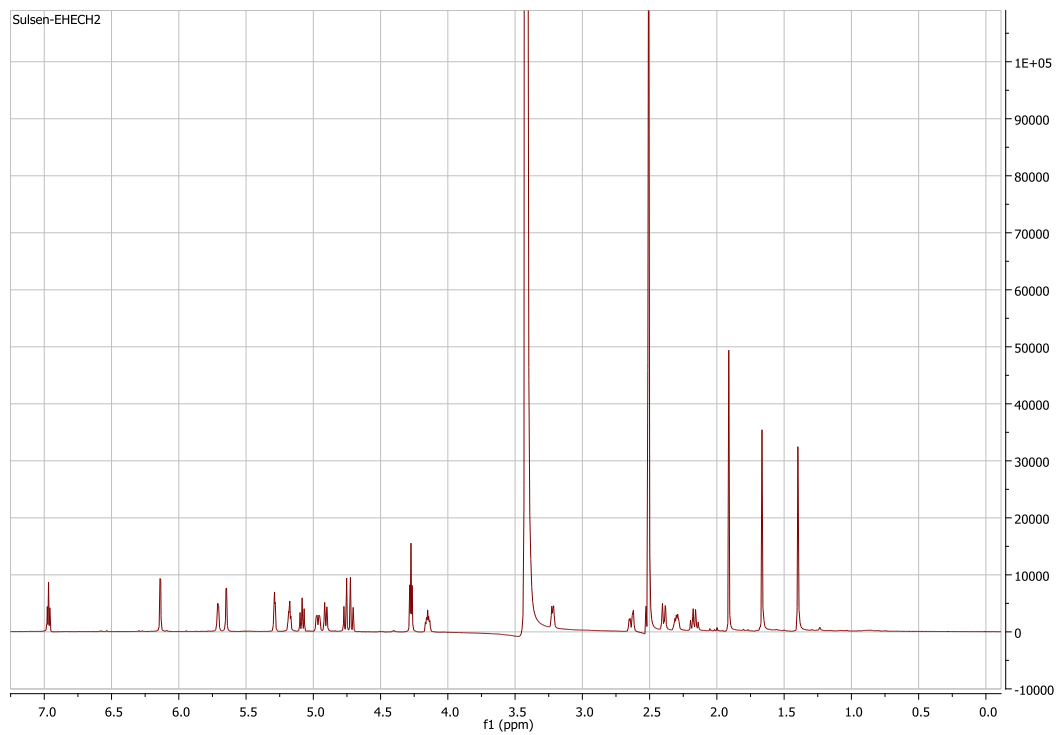

**Figure S5. <sup>1</sup>H-NMR spectrum of santhemoidin C in DMSO-d<sub>6</sub>.**

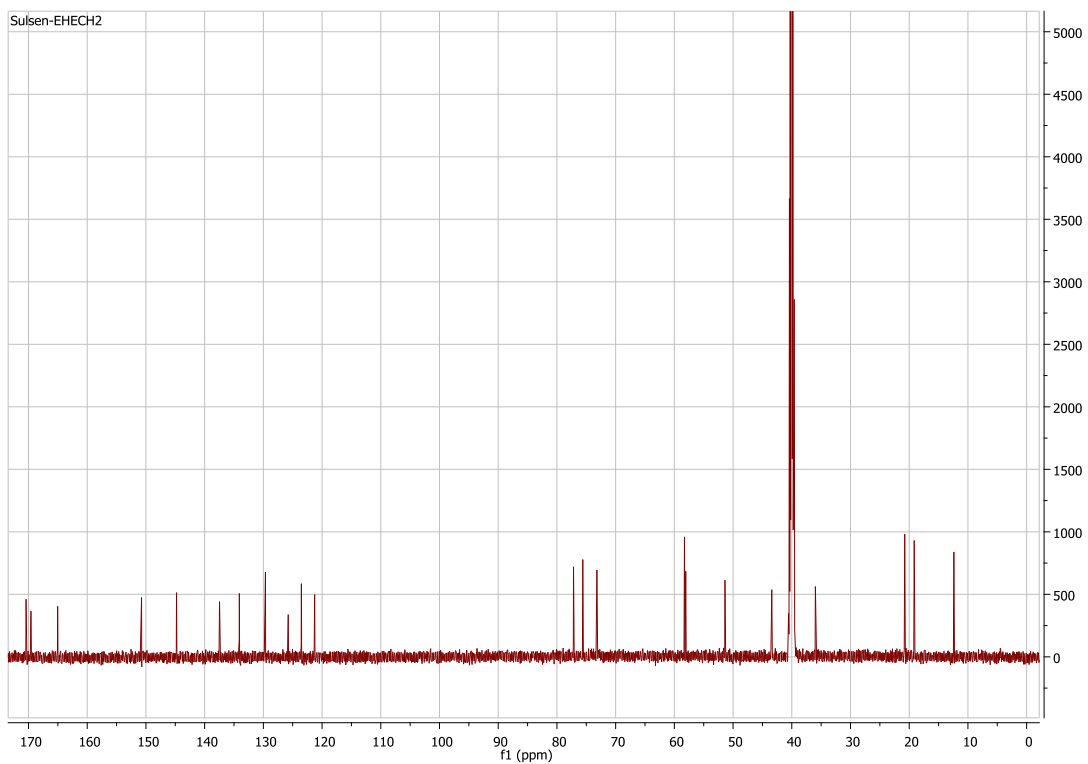

Figure S6.  $^{13}\text{C}$ -NMR spectrum of santhemoidin C in  $\text{DMSO-d}_6$ .

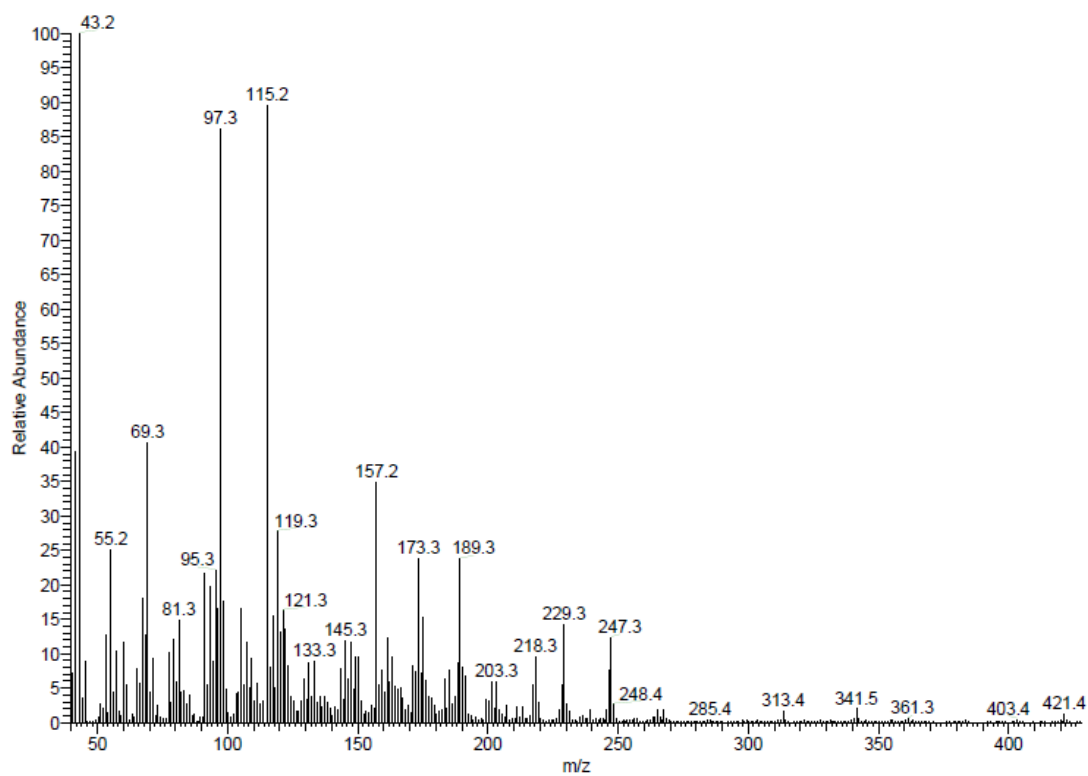

Figure S7. EI-MS spectrum of santhemoidin C (70 eV).

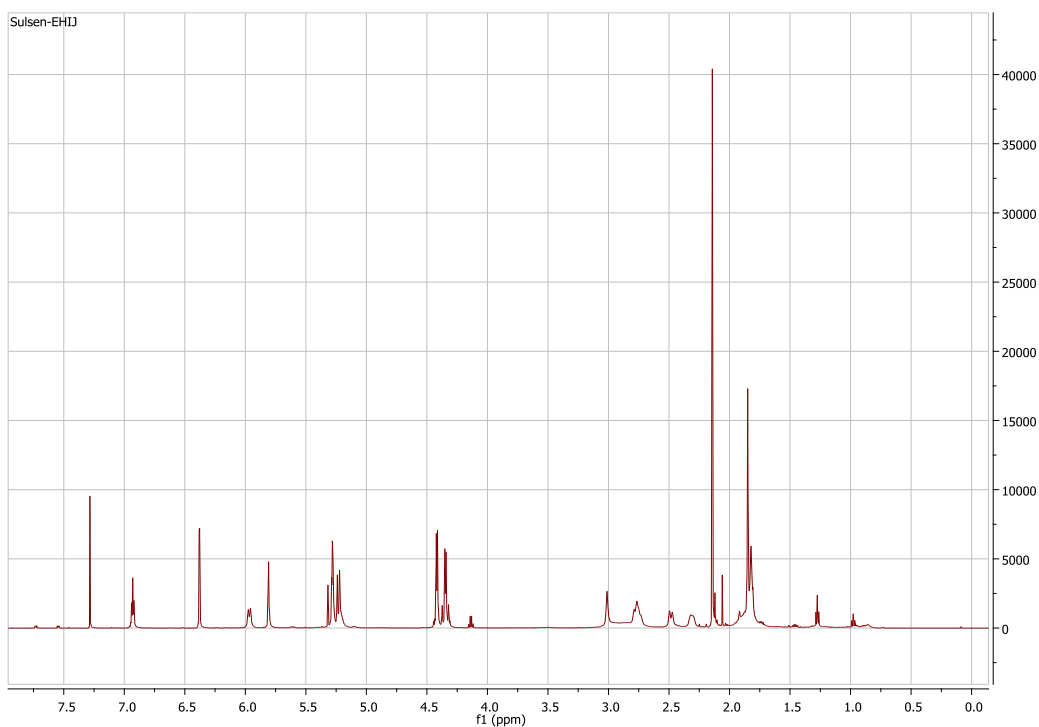

**Figure S8.**  $^1\text{H-NMR}$  spectrum of eucannabinolide in  $\text{CDCl}_3$ .

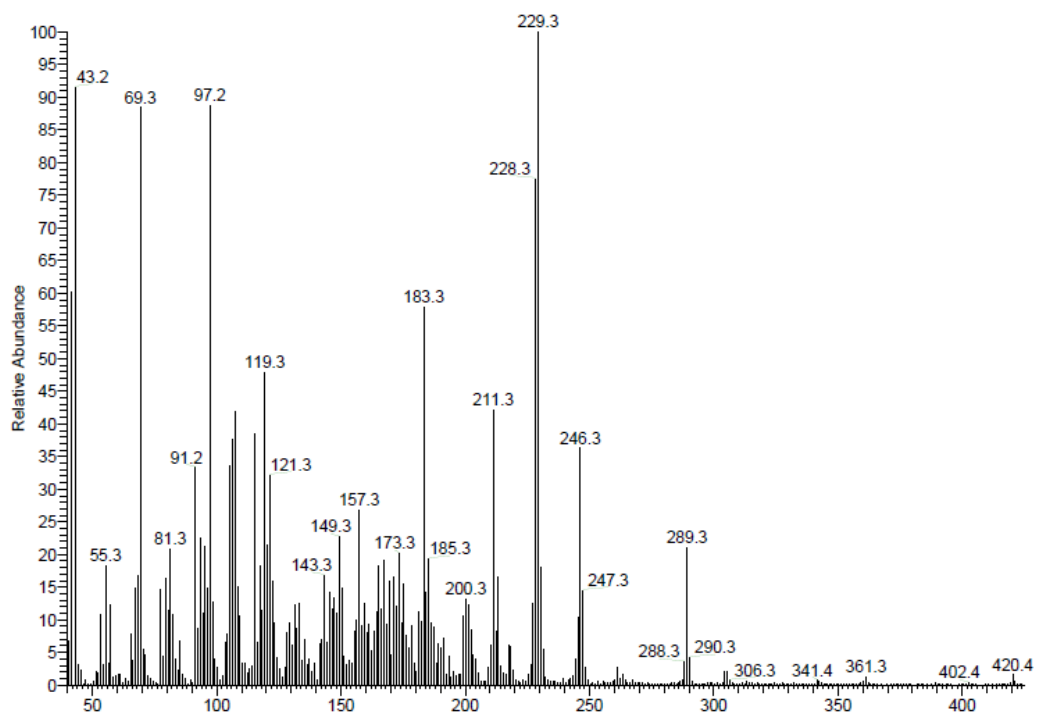

**Figure S9.** EI-MS spectrum of eucannabinolide (70 eV).
